# Supplementary material for: Optimizing Pre Liming pH for Efficient Juice Clarification Process in Sri Lankan Sugar Factories
Source: Research Square preprint supplement (doi:10.21203/rs.3.rs-362414/v1), 2021-03-31

Coagulated colloids

Liming

Heating

Ca2+

Ca2+

Ca2+

Ca2+

PO43-

PO43-

Ca2+

Ca2+

PO43-

Ca2+

PO43-

Ca2+

Ca2+

Ca2+

Ca2+

Ca2+

Ca2+

Adsorbed Layer

Cane Juice Particle

Calcium Phosphate forms (Lime + Phosphate in juice)

Ca2+

Larger flocs

Keeping enough time for precipitation


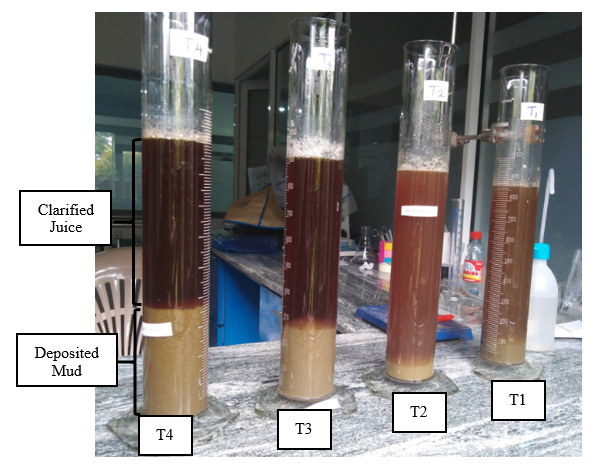

Supplement: Supplementary file 1 [file 18a78e0f4ad665fcac6e7e9f.docx]
